# Supplementary material
Source: publisher site journal article supplement (https://www.dovepress.com/get_supplementary_file.php?f=388342.docx)
Supplement: Supplementary file 1 [file get_supplementary_file.php]

Supporting information

# pH/Redox dual-responsive drug delivery system with on-demand RGD exposure for photochemotherapy of tumors

Yaning Li1, Junfang Nie1, Jie Dai1, Jun Yin1, Binbin Huang1, Jia Liu1，Guoguang Chen1,* and Lili Ren1,2,*

1School of pharmacy, Nanjing Tech University, 30th South Puzhu Road, Nanjing, 211816, China;

2Department of Microbiology and Immunology, Stanford University, Stanford, CA, 94305, USA

Correspondence: Guoguang Chen1,* and Lili Ren1,2,*

1School of pharmacy, Nanjing Tech University, 30th South Puzhu Road, Nanjing, 211816, China;

2Department of Microbiology and Immunology, Stanford University, Stanford, CA, 94305, USA

Tel : +86-2558-139-416

Email : ggchen@njtech.edu.cn (G, Chen); renlili@njtech.edu.cn (L, Ren);

# Materials and methods

## *Materials*

DSPE-ss-NHS and NH2-PEG-NH2 were purchased from Xi'an ruixi Biological Technology Co., Ltd. (Xi'an, China). DOC, IR780 and other chemical reagents were obtained from Shanghai Macklin Biochemical Co., Ltd. (Shanghai, China) with the highest available purity. The staining solution and kits involved in the experiment were purchased from Beyotime Biotechnology. (Shanghai, China). L02 cell line, MCF-7 cell line and MDA-MB-231 cell line were a gift from the Shanghai cell bank of Chinese Academy of Science. (Shanghai, China). Fetal bovine serum (FBS) and phosphate buffered saline (PBS) was from SenBeiJia Biological Technology Co., Ltd. (Nanjing, China). Dulbecco's Modified Eagle Medium (DMEM), Trypsin-EDTA (0.25%) and penicillin-streptomycin solutions was offered by Nanjing BioChannel Biotechnology Co., Ltd. (Nanjing, China).

The structure of the polymer was verified by 1H NMR analysis (Bruker AVANCE III 400MHz). The number average molecular weight (Mn) of the polymer was determined by gel permeation chromatography (Shimadzu LC-20A). The critical micelle concentration (CMC) was measured by fluorescence spectrophotometer (Hitachi F-2500). The zeta potential and particle size of micelles were measured with Zetasizer Nano ZS90 (Malvern Panalytical Ltd). The drug content of DOC and IR780 were determined by high performance liquid chromatography (HPLC, Shimadzu LC-20A) and ultraviolet spectrophotometer (UV, Shimadzu 2450). The morphology of nanoparticles was examined by transmission electron microscope (TEM, JEOL JEM-2100F). Cell uptake and other cell experiments was taken with a fluorescent inverted microscope (Nikon, TE2000). The blood routine was tested by hematology analyzer (Sysmex, KX-21) and the blood biochemical index was obtained by automatic blood biochemistry analyzer (Mindray, BS850).

## *Cell Culture*

MCF-7, MDA-MB-231 and L02 cells were cultured in DMEM containing 10% fetal bovine serum (FBS) and 1% penicillin and 1% streptomycin. The cell incubator parameters were set to 37°C, 5% CO2 and 100% humidity.

## *Animals*

New Zealand Rabbit (2.5-3 kg) and female BALB/c nude mice (4~5 weeks, 17-19 g) were purchased from Beijing Vital River Laboratory Animal Technology Co., Ltd. All animal experiments were approved by the Guidelines for Care and Use of Laboratory Animals of Nanjing Tech University and experiments were approved by the Animal Ethics Committee of Jiangsu Center for Safety Evaluation of Drugs.

## *Synthesis of block copolymer*

The synthesis route of block polymer of cRGD-PBAE-PEG-ss-DSPE was described as follow. Brifely, DSPE-ss-NHS, NH2-PEG-NH2 and triethylamine were dissolved in 15mL DMF at a molar ratio of 1:1.2:2. The resulting mixture was stirred and reacted at room temperature for 8 hours. Immediately, after the reaction solution was dialyzed in water with a dialysis bag (MwCO: 3500 Da) for 24 h. After that, the dialysate was freeze-dried to obtain DSPE-ss-PEG-NH2 product.

Subsequently, acryloyl chloride, triethylamine and the prepared DSPE-ss-PEG-NH2 were reacted in a molar ratio of 2:2:1. The DSPE-ss-PEG-NH2 and triethylamine was dissolved in a flask with 10 mL of chloroform. The acryloyl chloride was added dropwise to the stirred reaction liquid under the condition of an ice bath. After reacting at room temperature for 4 h, the mixture was washed three times with water and dried over by anhydrous sodium sulfate. The reaction solution was distilled under reduced pressure and then precipitated with excess ice diethyl ether to obtain the product DSPE-ss-PEG-propylene.

Afterwards, the DSPE-ss-PEG-propylene, 1,6-bis(acryloyloxy)hexane and 1,3-bis(4-piperidine)propane were dissolved in 10 mL of chloroform at a molar ratio of 1:10:11. After reacting at 55°C for 24 h, the mixture was precipitated into an excess of ice diethyl ether to generate DSPE-ss-PEG-PBAE.

In order to graft the polymer with cRGD peptide, DSPE-ss-PEG-PBAE and acryloyl ethylenediamine were dissolved in 10 mL of chloroform in a molar ratio of 1:2. After stirring the reaction at 55°C for 24 h, the solution was precipitated in a large amount of ice diethyl ether to obtain DSPE-ss-PEG-PBAE-NH2. The above product was dried in vacuum and then dissolved in 6 mL of chloroform with 3-(maleimido)propionate succinimide in a molar ratio of 1:1.2. It was precipitated into an excess of ice diethyl ether to generate the DSPE-ss-PEG-PBAE-Mal.

Finally, DSPE-ss-PEG-PBAE-Mal and cRGD with a molar ratio of 1:1.1 were placed in a flask and the mixture was dissolved in 5 mL DMF. After stirring for 24 h at room temperature, the reaction solution was dialyzed in pure water for 24 h and lyophilized to get the DSPE-ss-PEG-PBAE-cRGD. The structure of each product was characterized by 1H NMR spectroscopy and the DSPE-ss-PEG-PBAE-cRGD was also characterized by gel permeation chromatography (GPC).

## *Animals model*

BALB/c nude mice were inoculated subcutaneously with 200 µL of matrigel containing logarithmic growth phase MDA-MB-231 cell suspension (1×107 cells/mL) in the area near the left hind limb of mice after one week of acclimation in the rearing environment. The growth of bulges at the inoculation site indicated successful modeling of the tumor-bearing mice. The length and width of the tumor were measured using electronic vernier calipers to calculate the tumor volume in mice. Selected tumor-bearing mice with different tumor volumes as needed. The tumor volume was calculated by the Eq (S1):

# Results and discussions

## *Synthesis and characterization of block copolymer*

The synthesis of RPPssD nanoparticles with multiple responses was divided into five reactions as shown in Figure S1. In order to realize the reduction-responsive type of the polymer, NH2-PEG-ss-DSPE was obtained by amide reaction of DSPE-ss-NHS and NH2-PEG-NH2 in the first reaction and its structure was identified by 1H NMR.

As shown in Figure S2, the assignment of each peak was corresponding to the hydrogen in the structure of NH2-PEG-ss-DSPE. Among them, δ 3.13 (8, -CONHCH2-) demonstrated the connection of DSPE-ss-NHS to NH2-PEG-NH2. δ 0.87 (1, CH3), δ 1.25 (3, CH2) are the characteristic resonance peaks of DSPE, while the chemical shift of δ 3.64 (11, -OCH2CH2-) indicated the existence of PEG. In addition, δ 1.99 (12, -NH2) is the proton characteristic peak of the terminal amino group of NH2-PEG-NH2. δ 2.61 (10, -CH2-ss-) and δ 2.97 (9, -COCH2CH2-ss-) are the hydrogen proton peaks near the disulfide bond.

Subsequently, the prepared DSPE-ss-PEG-NH2 was reacted with acryloyl chloride to obtain the DSPE-ss-PEG-propylene, which was used to synthesize acid-responsive PBAE. The 1H NMR spectrum in the Figure S3 proved its successful synthesis. The chemical shifts of most of the hydrogen protons remained unchanged, while the newly appeared characteristic peaks of 1H NMR at three positions of δ 5.62 (13, -COCH=CH2), δ 6.18 (12, -COCH=CH2) and δ 6.31 (13, -COCH=CH2) correspond to the characteristic peaks of the double bond in acrylate. Meanwhile, the amino characteristic peak at the end of DSPE-ss-PEG-NH2 at δ 1.99 (12, -NH2) disappeared. According to this, it could be concluded that DSPE-ss-PEG-NH2 was successfully reacted with acryloyl chloride, so that the amino group of DSPE-ss-PEG-NH2 was modified into an acrylate bond to obtain DSPE-ss-PEG-propylene.

Afterwards, DSPE-ss-PEG-propene, 1,6-bis(acryloyloxy)hexane and 1,3-bis(2-piperidine)propane obtained acid-responsive PBAE blocks through Michael addition reaction, which 1H NMR spectrum was shown in Figure S4. It can be observed from the 1H NMR that δ 2.51 (14, -NCH2-), δ1.69 (15, -NCH2CH2-), δ1.24 (18, -CH2CH2-) and δ1.19 (17, -CH2CH2-) are the characteristics peak of 1,3-bis(2-piperidine)propane, while δ=4.09 (20,-OCH2CH2- ) and 1.94 (19,-CH2CH2CH2-) proved the existence of 1,6-bis(acryloyloxy)hexane. In addition, δ 2.67 (12, -COCH2-) and δ 2.87 (13, -CH2CH2N-) are the hydrogen proton shifts of the methylene groups of DSPE-ss-PEG-propene, 1,6-bis(acryloyloxy)hexane and 1,3-bis(2-piperidine)propane linking segments, respectively. At the same time, the disappearance of the chemical shift of the diene bond at δ 5.62 (13, -COCH=CH2), δ 6.18 (12, -COCH=CH2) and δ 6.31 (13, -COCH=CH2) further proved the synthesis of DSPE-ss-PEG-PBAE.

In order to realize the targeting of the polymer, DSPE-ss-PEG-PBAE was maleimidized and reacted with cRGD to obtain the final product. From the 1H NMR spectrum of DSPE-ss-PEG-Mal (Figure S5), it could be seen that δ 6.67 (24, -COCH=CHCO-) proved the synthesis of DSPE-ss-PEG-PBAE-Mal. In the 1H NMR spectrum (Figure S6) of cRGD-PBAE-PEG-ss-DSPE, δ 6.61 and δ 6.94 are described as hydrogen on the benzene ring in cRGD, while the disappearance of the characteristic peak at δ 6.67 in DSPE-ss-PEG-PBAE-Mal also proved the connection of cRGD was successful. In addition, as shown in the Figure S7, the number average molecular weight (Mn) of cRGD-PBAE-PEG-ss-DSPE measured by GPC was 8849 Da, while the measured PDI was 1.61, indicating the molecular weight distribution of the polymer was relatively uniform.

#

Supplementary Figures:

**Figure S1** The synthesis process of block polymer of cRGD-PBAE-PEG-ss-DSPE

**
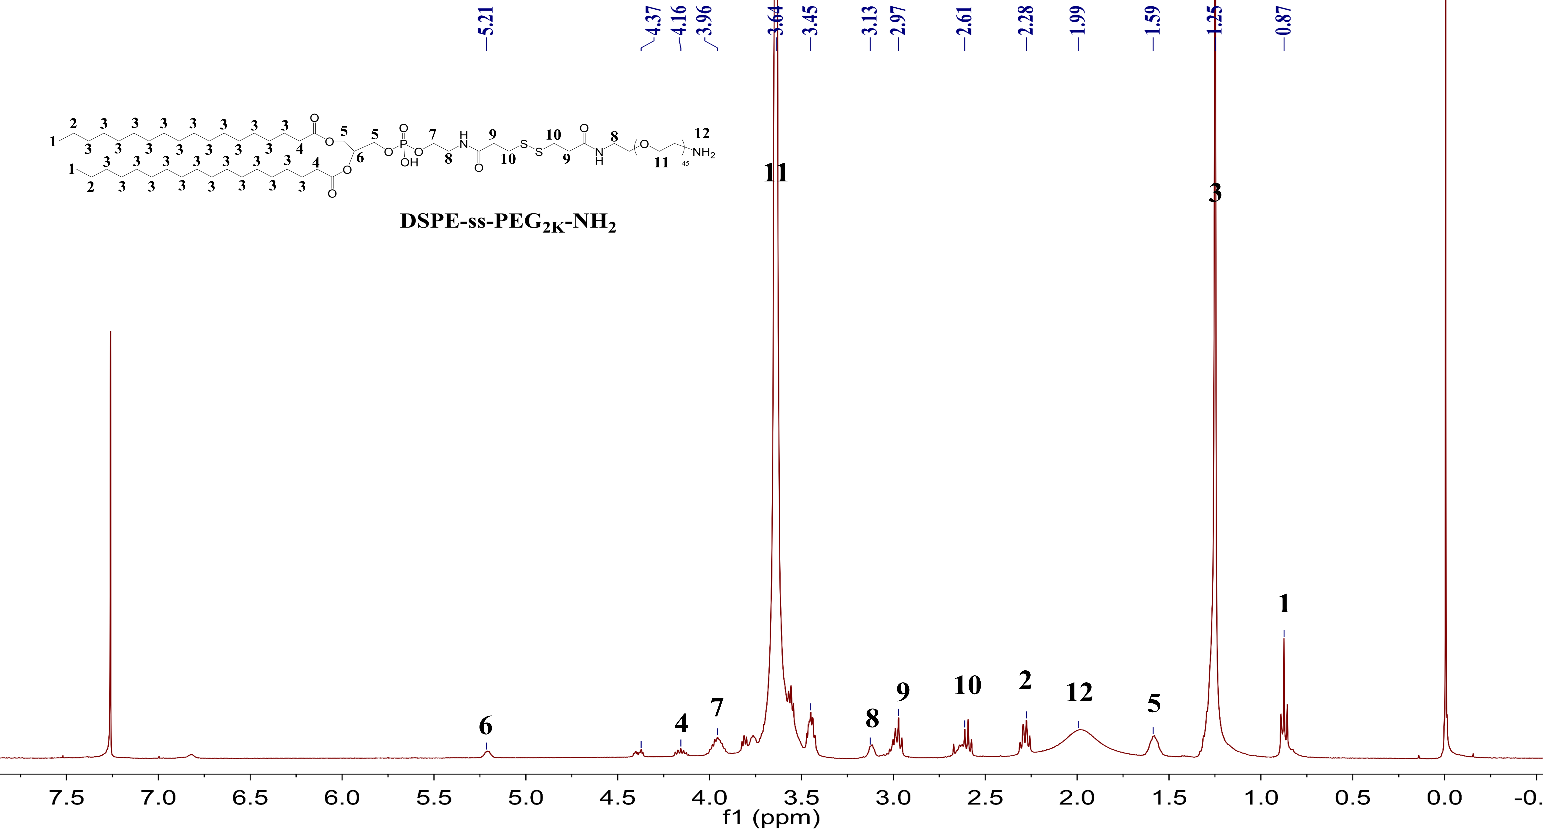
Figure S2** 1H NMR spectrum of NH2-PEG-ss-DSPE.

**
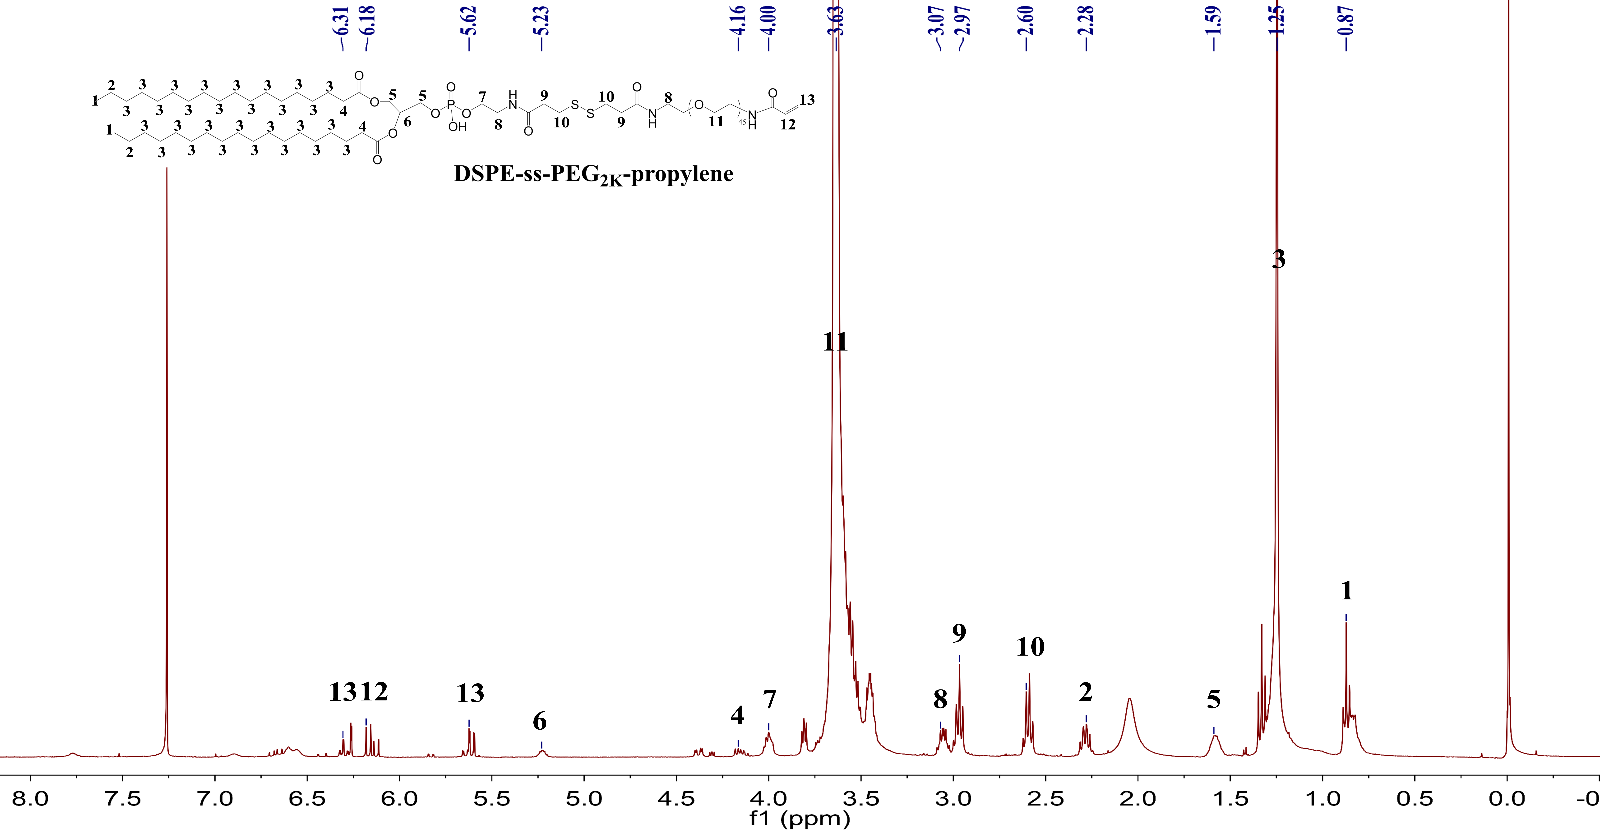
Figure S3** 1H NMR spectrum of propylene-PEG-ss-DSPE.


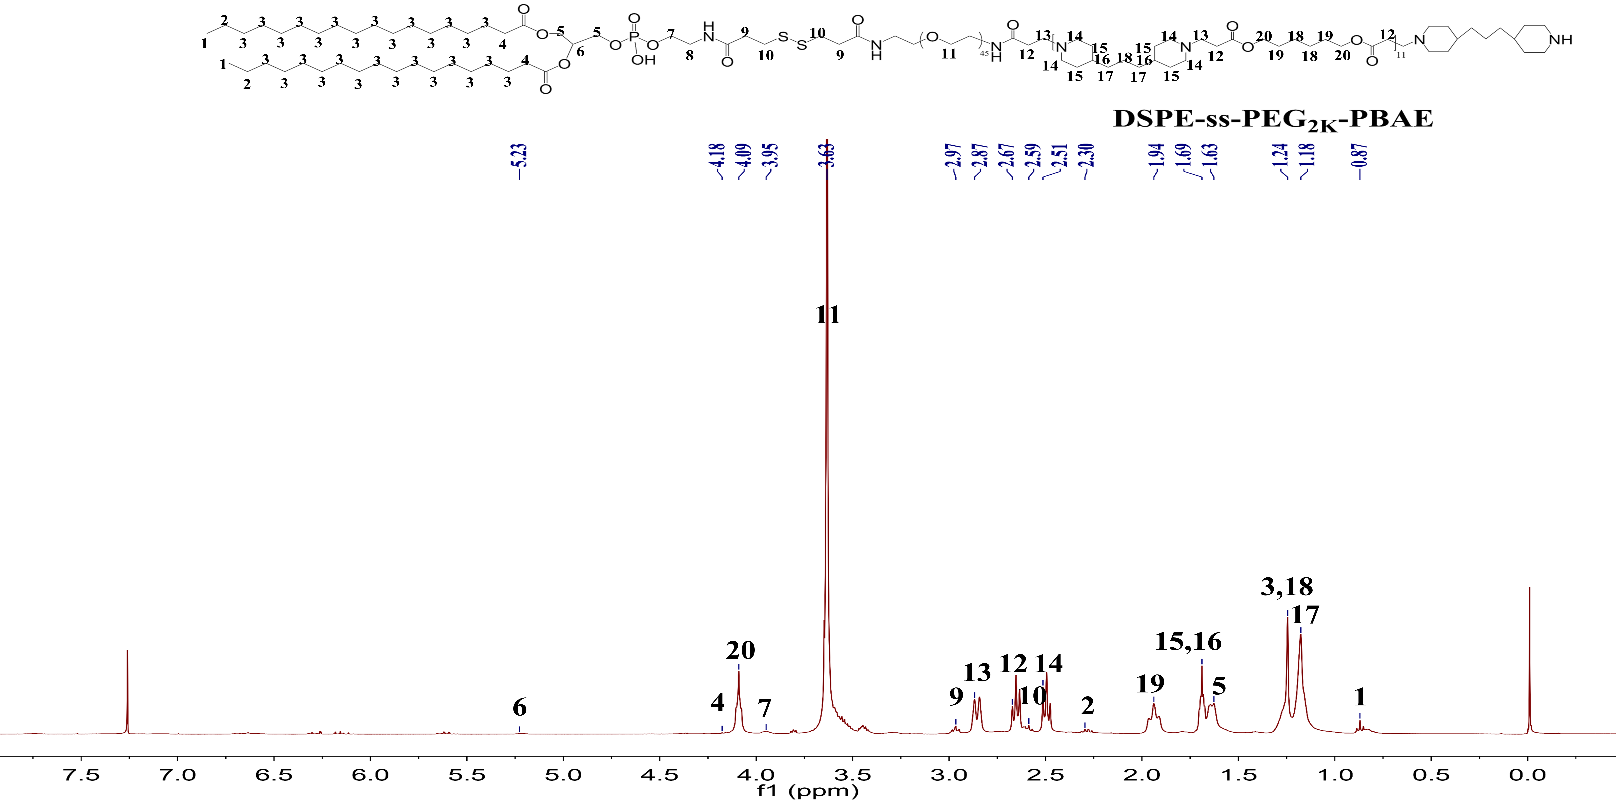


**Figure S4** 1H NMR spectrum of PBAE-PEG-ss-DSPE.

**
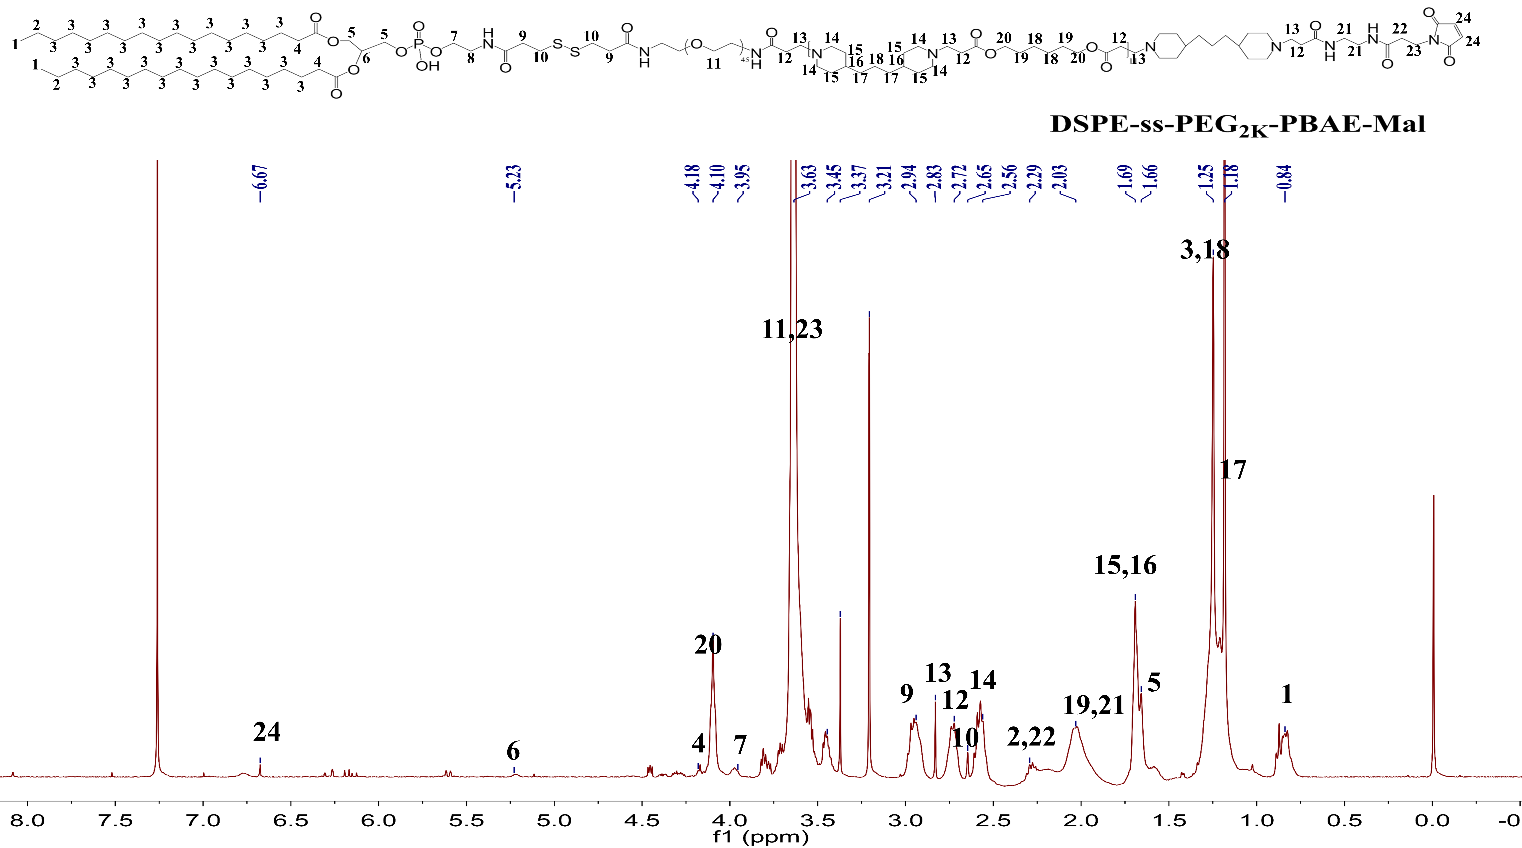
Figure S5** 1H NMR spectrum of Mal-PBAE-PEG-ss-DSPE.

**
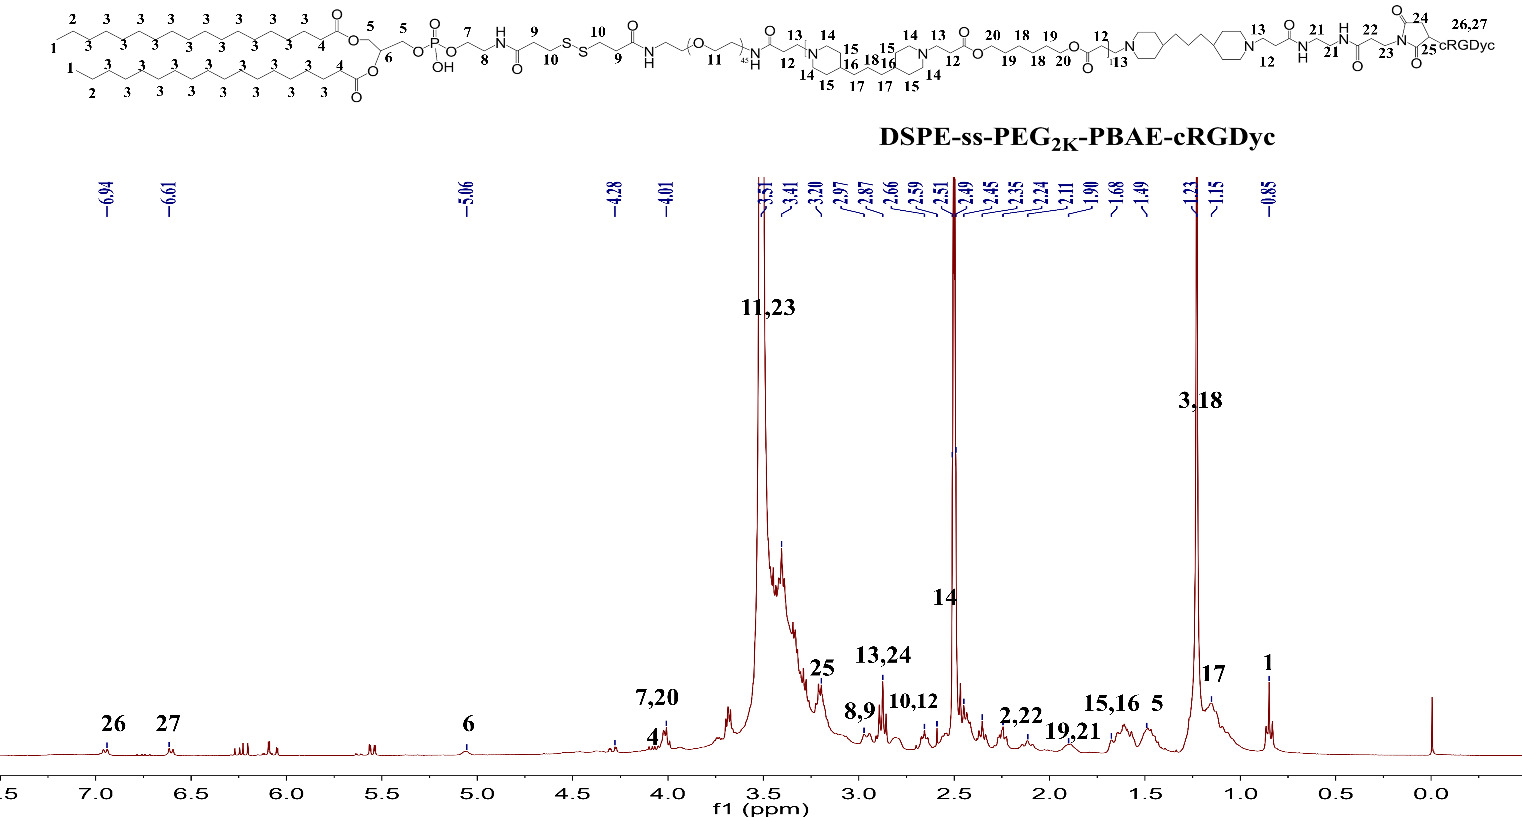
**

**Figure S6** 1H NMR spectrum of cRGD-PBAE-PEG-ss-DSPE.

**
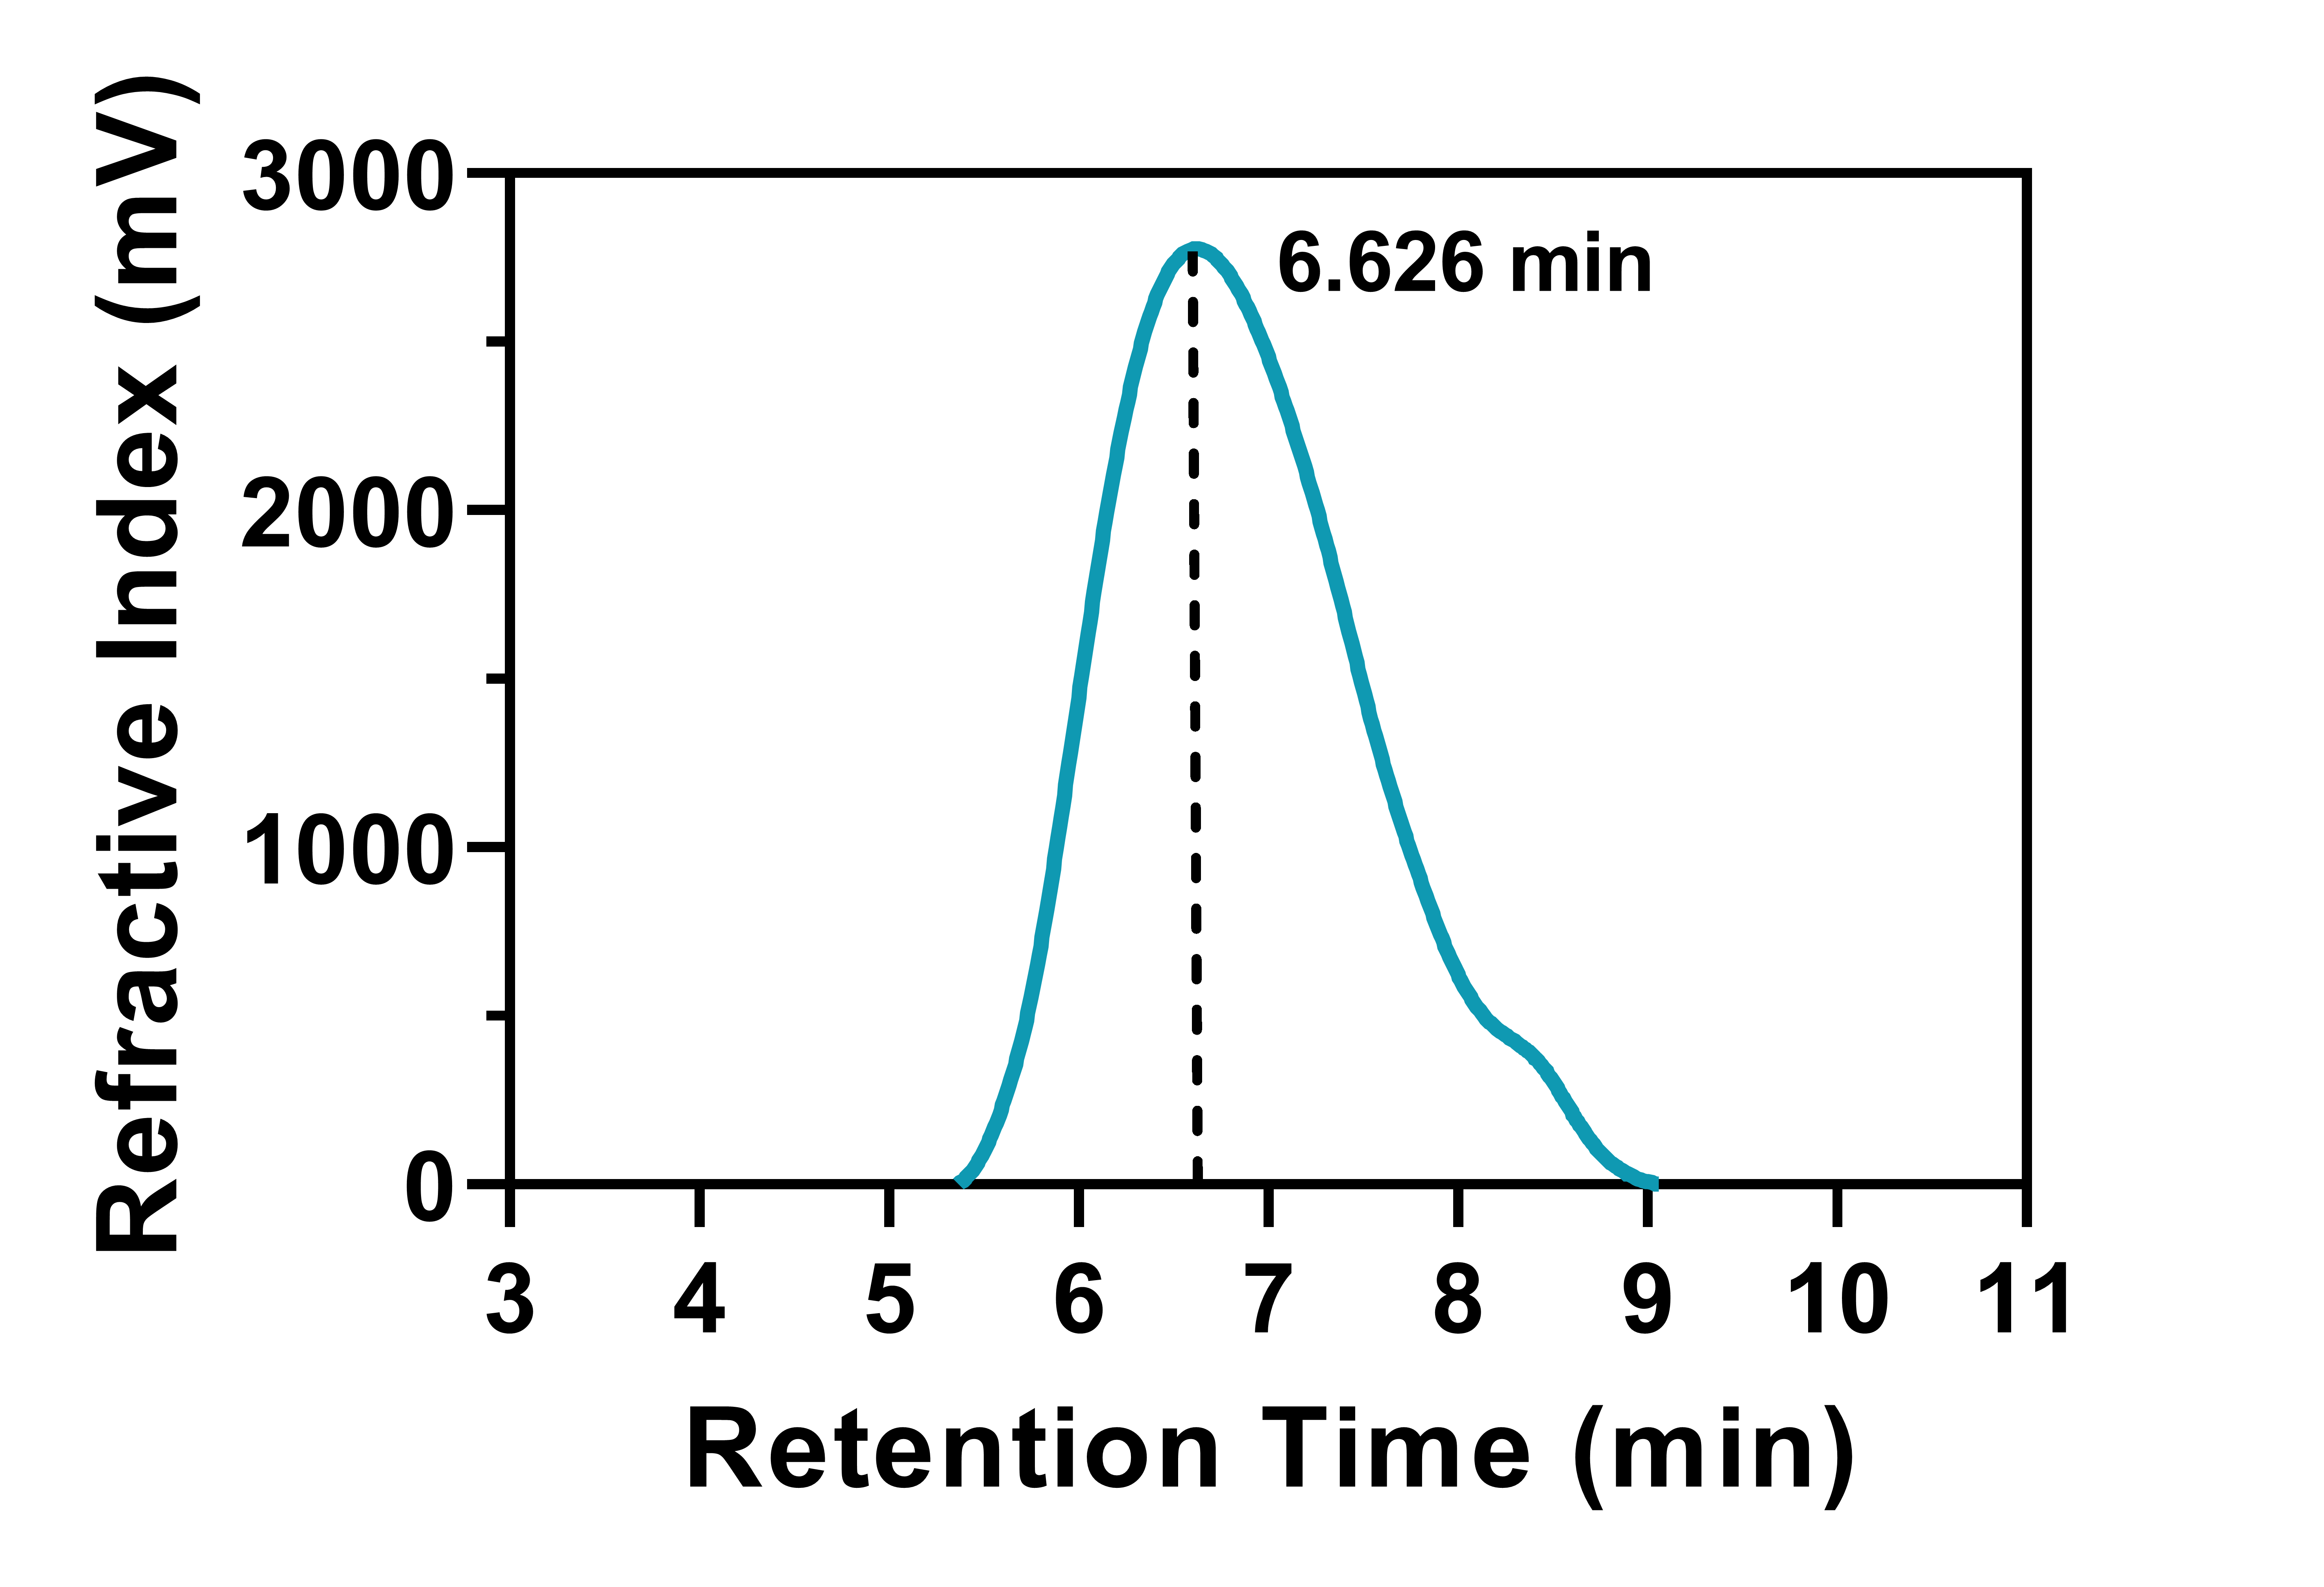
**

**Figure S7**GPC curves of cRGD-PBAE-PEG-ss-DSPE.


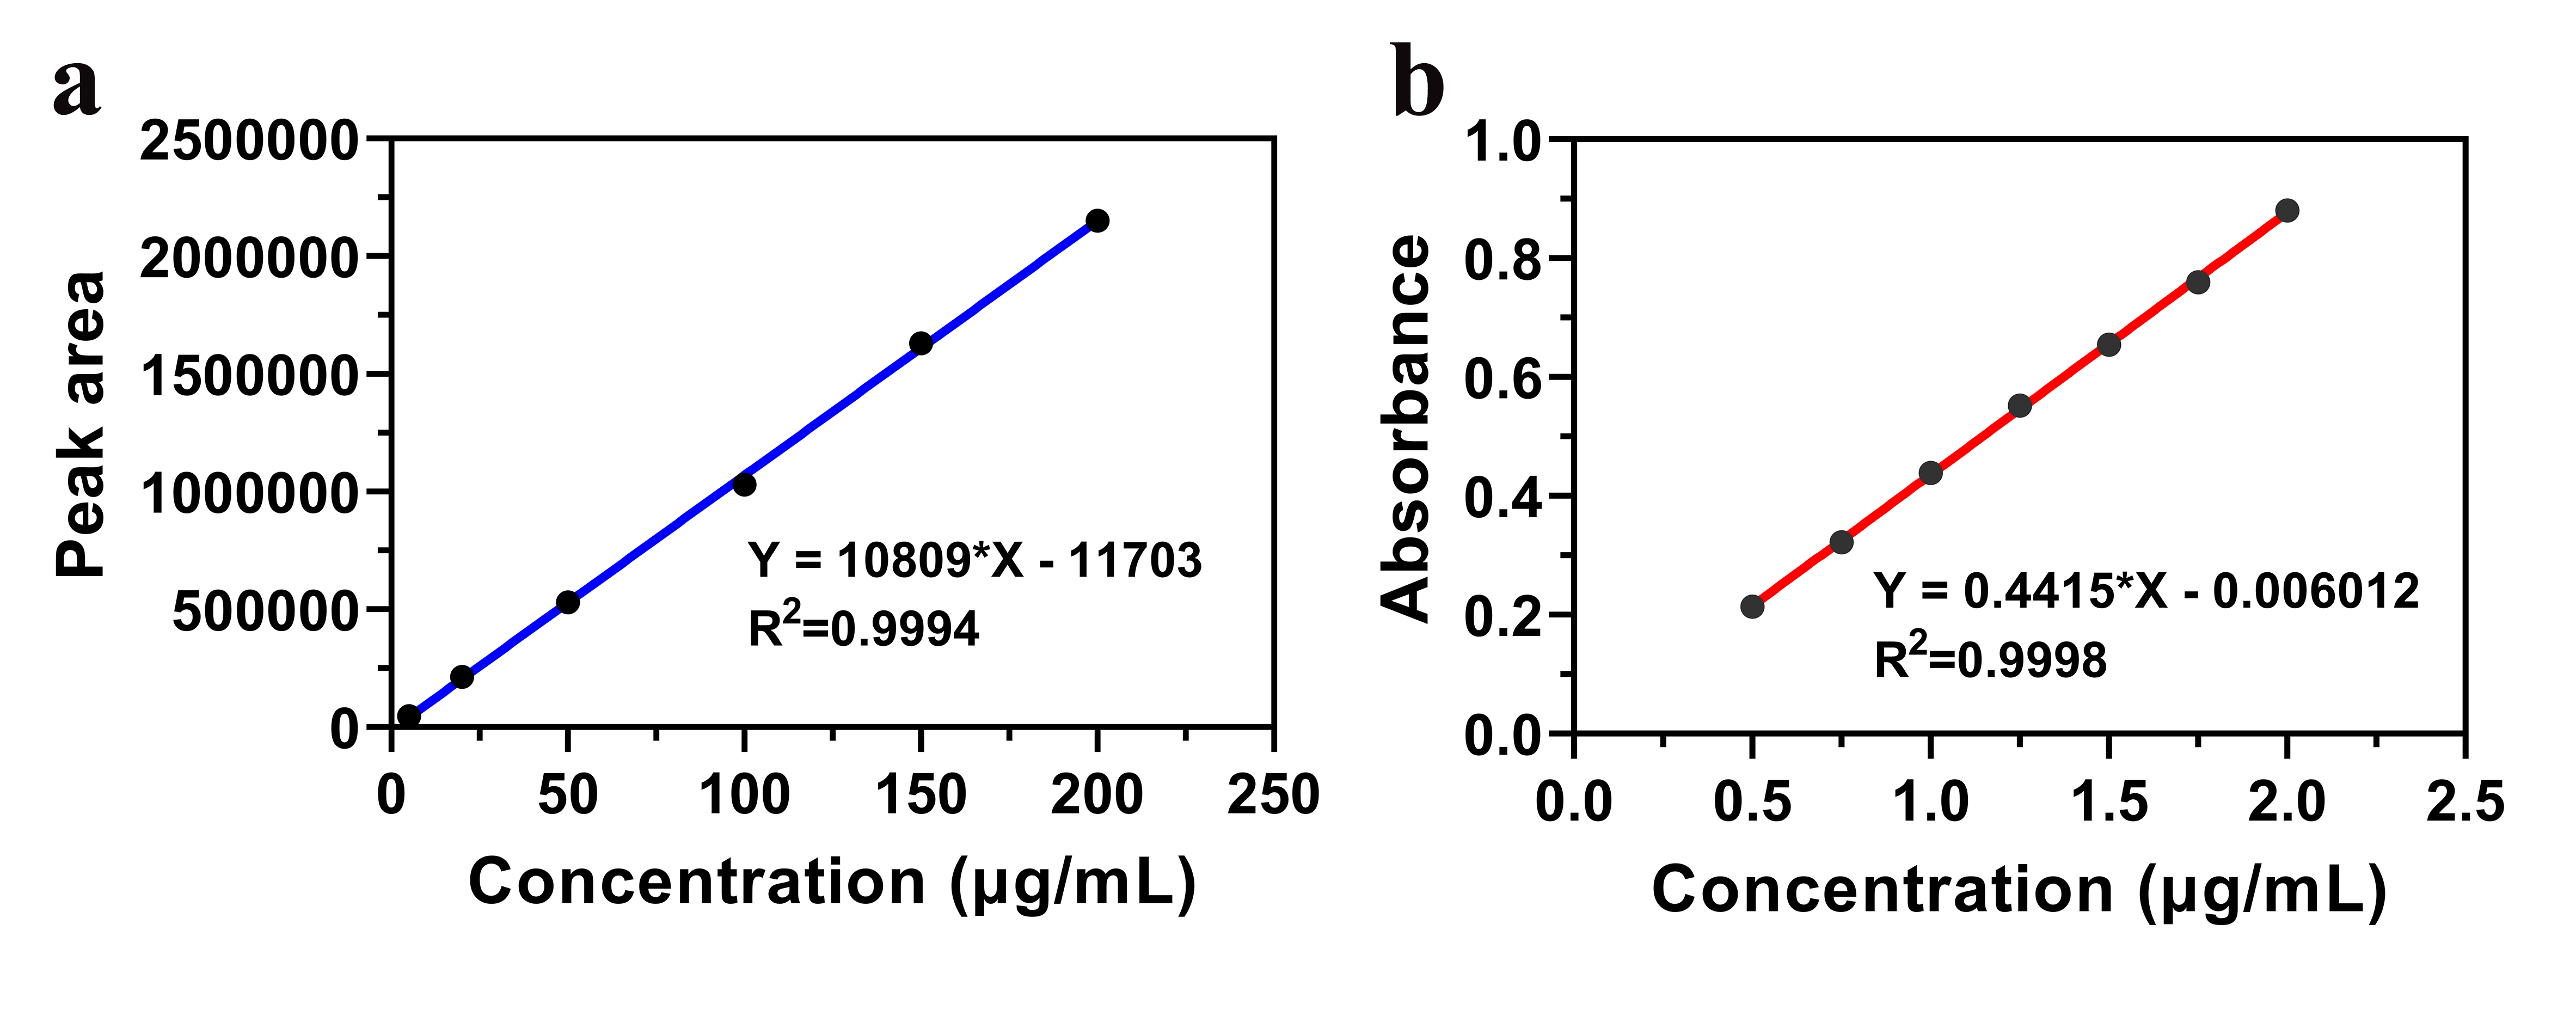
**Figure S8** The standard curves for a) DOC and b) IR780 concentration calculations. Data are presented as mean ± standard deviation (n = 3).

**
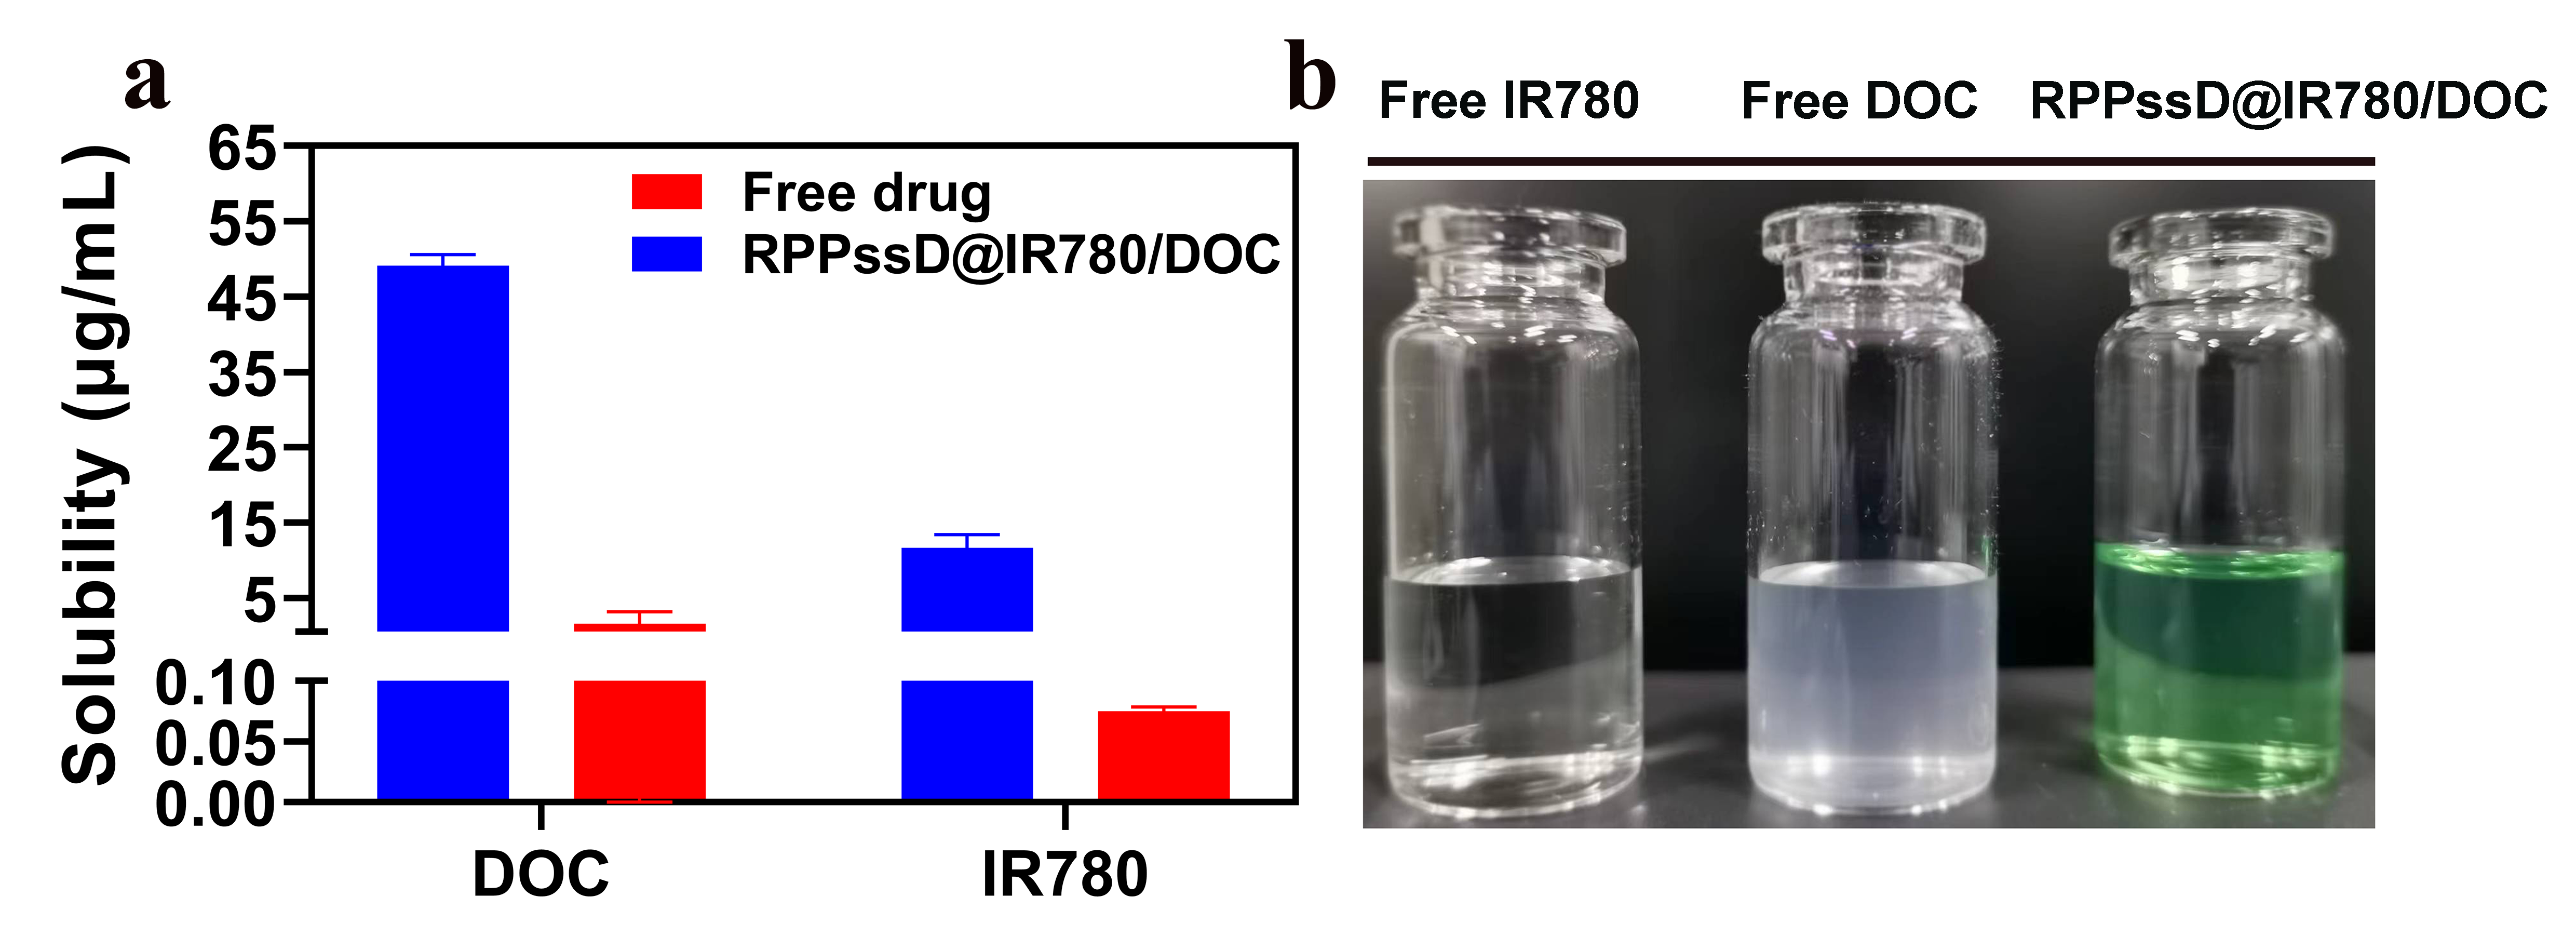
**

**Figure S9** a) The saturated solubility of DOC, IR780 and RPPssD@IR780/DOC in water and b) the photo of the dissolution phenomenon. Data are presented as mean ± standard deviation (n = 3).

**
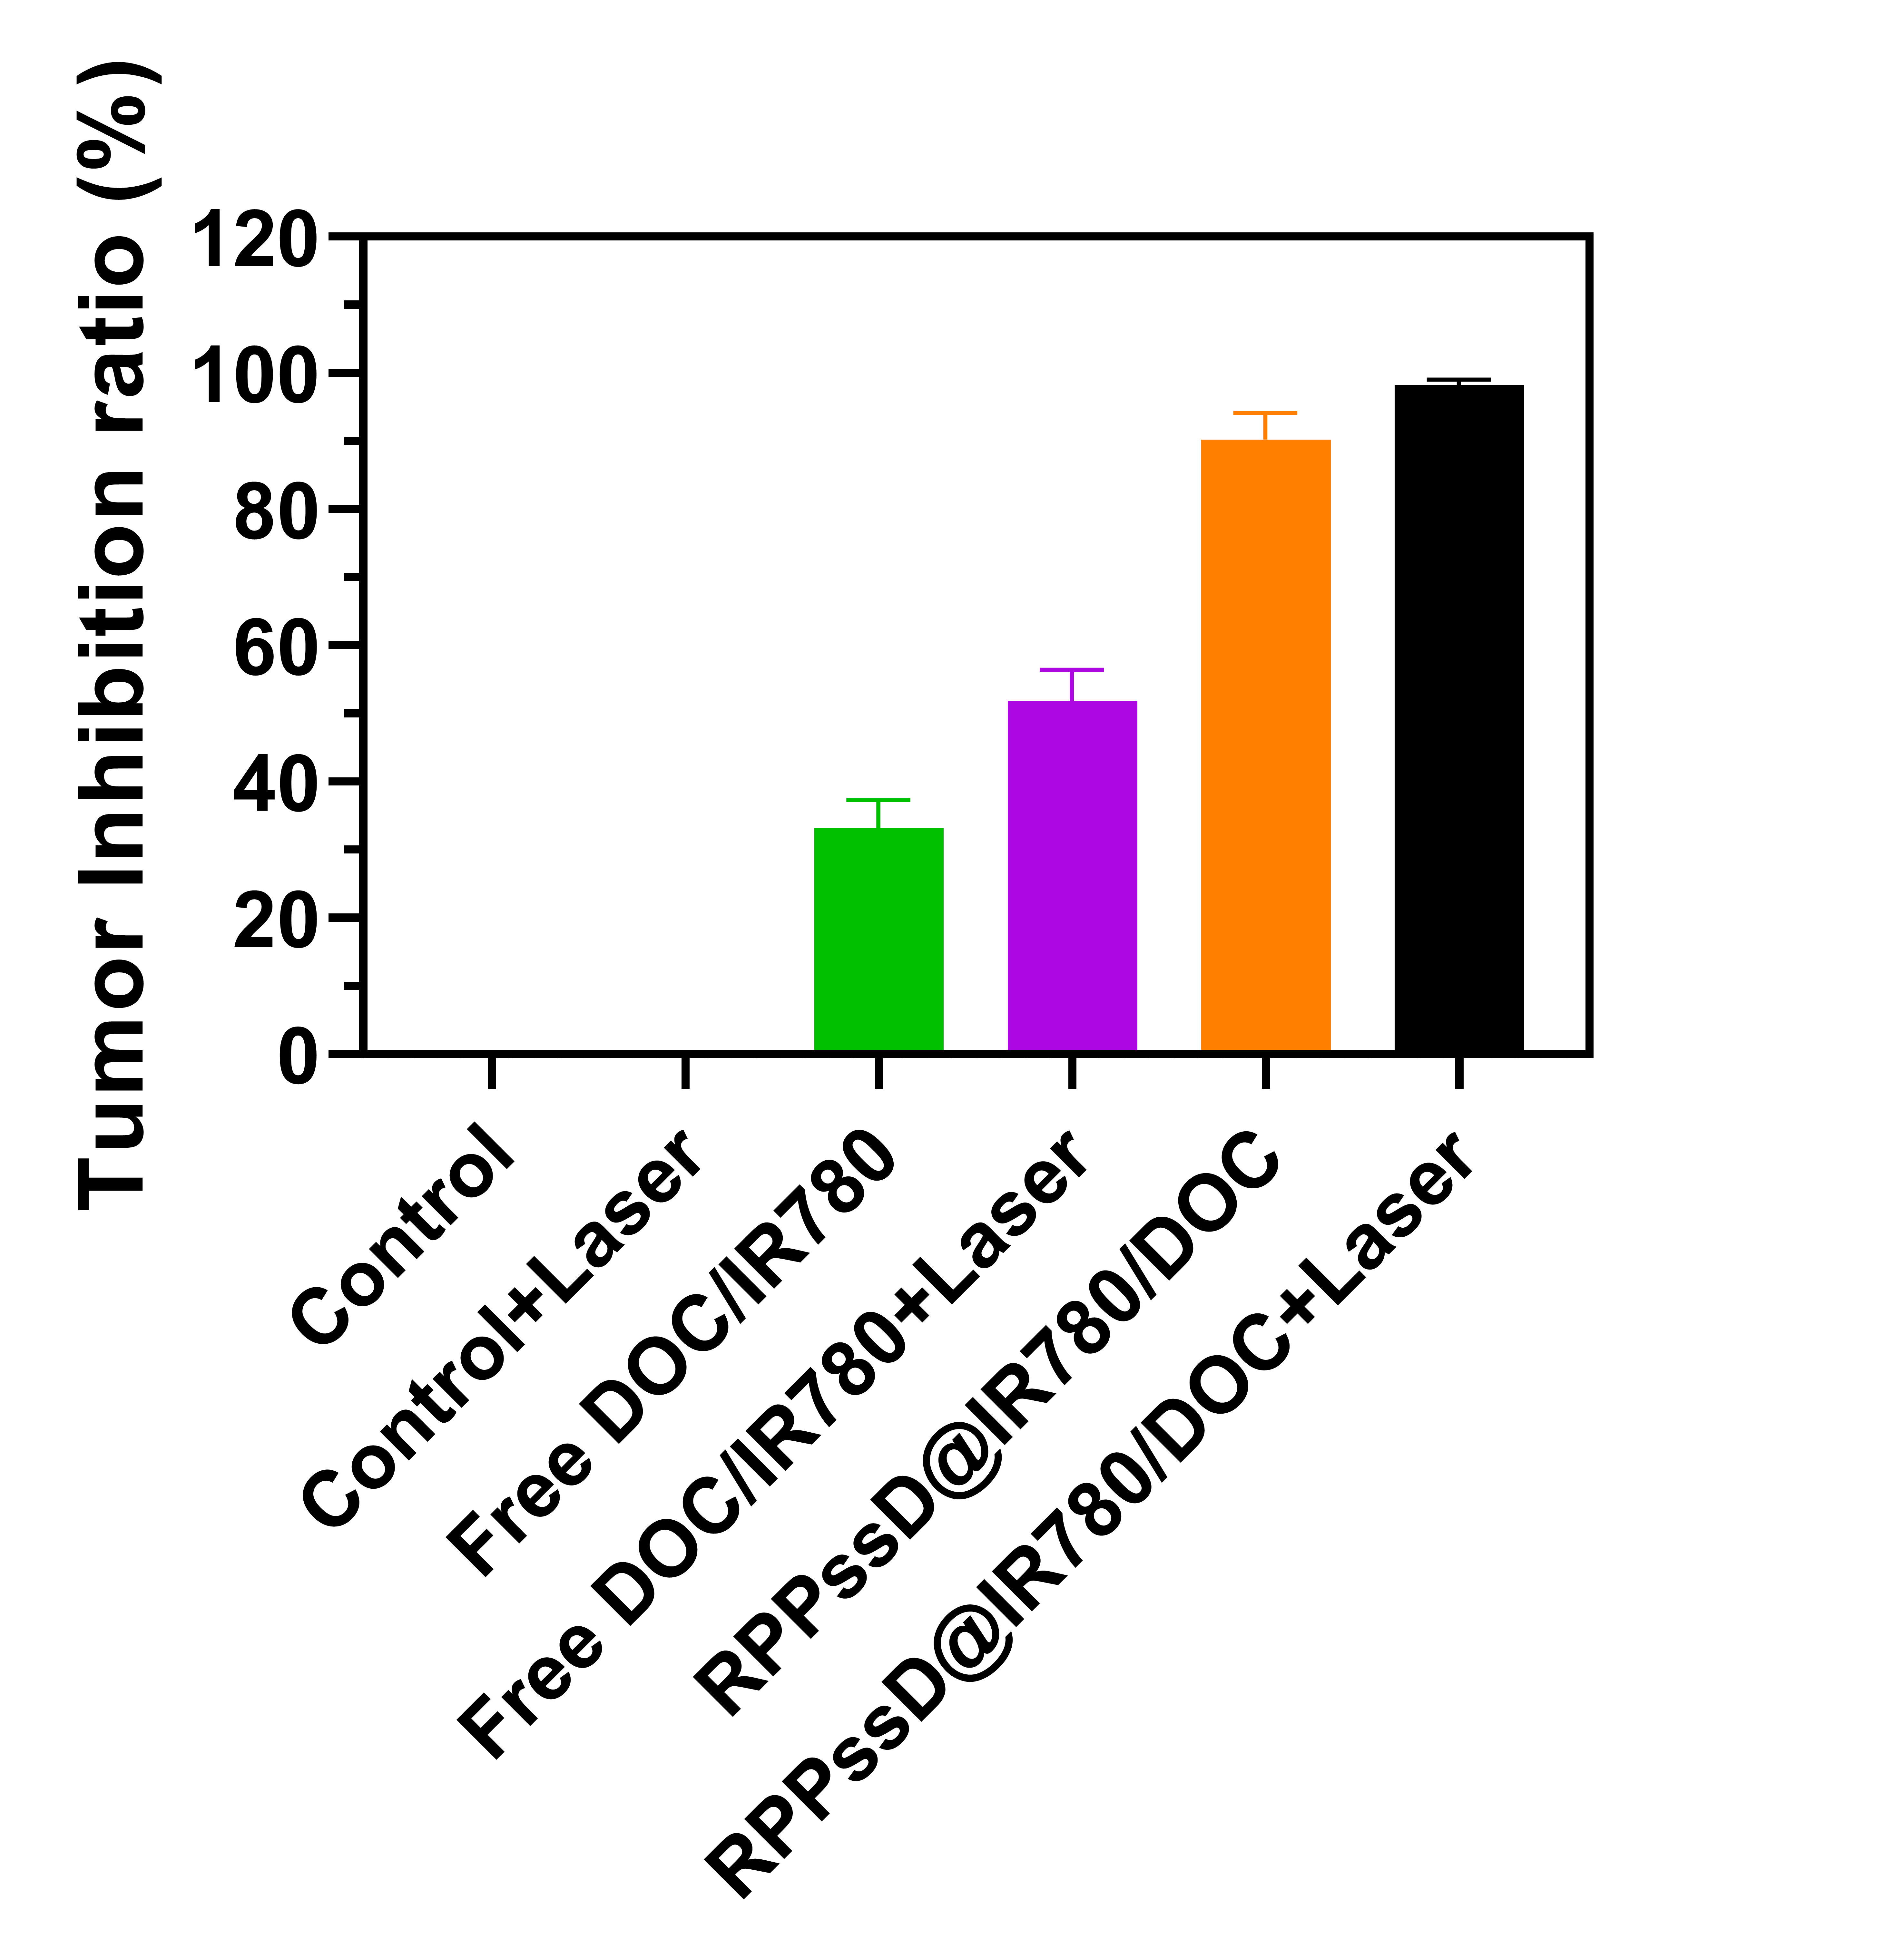
Figure S10**The tumor inhibition ratio of tumor-bearing mice in each group (The tumor inhibition ratio (%)= (tumor weight in the control group - tumor weight in the treated group) / tumor weight in the control group)100). Data are presented as mean ± standard deviation (n = 6).
